# Supplementary material for: Destabilization potential of beta sheet breaker peptides on Abeta fibril structure: an insight from molecular dynamics simulation study
Source: Royal Society of Chemistry journal article supplement (doi:10.1039/d1ra03609b), 2021-01-01
Supplement: d1ra03609b1.pdf [file d1ra03609b1.pdf]

## Section A:

### Results of Abeta protofibril and various peptides for docking and two sets of 100ns simulations

**Table S1: Interaction Abeta protofibril and various peptides**

| System | Hydrogen Bond                                                                          | Hydrophobic Interactions                                                               |
|--------|----------------------------------------------------------------------------------------|----------------------------------------------------------------------------------------|
| APO    | 113PHE:1HIS<br>111VAL:1HIS<br>115GLU:2LYS<br>123ALA:8GLU<br>124ILE: 8GLU               | 112PHE:3GLN<br>114ALA:2LYS<br>124ILE:7PHE<br>125ILE:6PHE<br>127LEU:4LEU<br>128MET:5PRO |
| HFD    | 111VAL:1HIS<br>113PHE:1HIS<br>114ALA:2LYS<br>115GLU:2LYS<br>123ALA:8GLU<br>124ILE:8GLU | 112PHE:3GLN<br>127LEU:4LEU<br>128MET:5PRO                                              |
| HYD    | 88GLU:2GLY<br>115GLU:4PHE                                                              | 113PHE:4PHE                                                                            |
| RGT    | 6ALA:1PRO<br>6ALA:3LYS<br>7GLU:3LYS<br>8ASP:5VAL<br>11SER:7ALA<br>13LYS:6TYR           | 8ASP:4LEU<br>13LYS:6TYR<br>17ILE:4LEU<br>19LEU:4LEU                                    |
| PGK    | 107ILE:1LYS<br>132VAL:4VAL<br>134ILE:2LYS<br>135ALA:1LYS                               | 101MET:5PHE<br>110LEU:1LYS<br>128MET:5PHE<br>132VAL:3LEU<br>133VAL:1LYS<br>133VAL:3LEU |
| KKL    | 88GLU:2LEU                                                                             | 88GLU:4PHE<br>90VAL:4PHE<br>115GLU:2LEU                                                |
| KLV    | 25VAL:3PHE<br>27ALA:1LEU                                                               | 24VAL:4PHE<br>25VAL:3PHE<br>26ILE:2PRO<br>27ALA:3PHE                                   |
| LPN    | 115GLU:1LEU                                                                            | 115GLU:3PHE<br>117VAL:3PHE                                                             |

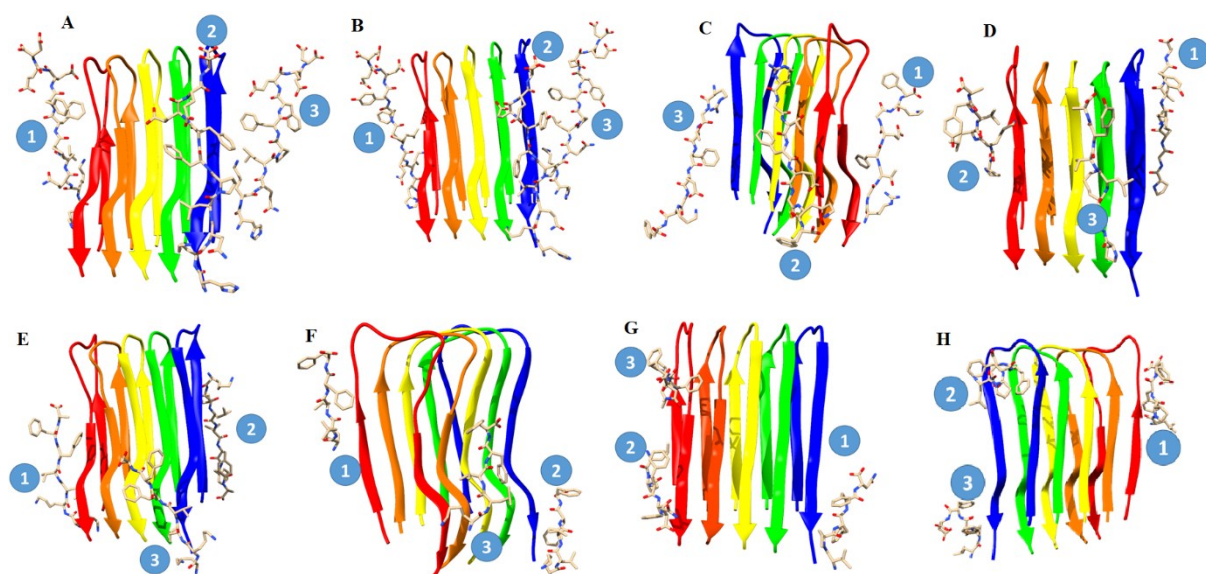

**Figure S1:** Docking representation of Abeta oligomer with top three pose of different peptides. Abeta protofibril. Each Abeta protofibril consist of five chains represented as blue:chain A, green : chain B, yellow: chain C, orange: chain D and red: chain E

**Table S2:** Docking results top three pose of different peptides

| Peptide    | Dock Score (Kcal/mol) (Top) | Dock Score (Kcal/mol) (Second Top) | Dock Score (Kcal/mol) (Second Three) |
|------------|-----------------------------|------------------------------------|--------------------------------------|
| HKQLPFFEED | -26.59                      | -23.67                             | -21.76                               |
| HKQLPFYEED | -29.54                      | -25.92                             | -23.65                               |
| RGTFEGKF   | -28.65                      | -24.13                             | -22.82                               |
| PGKLVYA    | -35.04                      | -33.46                             | -30.11                               |
| KKLVFFA    | -33.65                      | -32.2                              | -29.96                               |
| KLVFF      | -32.98                      | -29.33                             | -26.43                               |
| LPFFN      | -27.00                      | -24.18                             | -20.11                               |
| LPFFD      | -31.18                      | -28.72                             | -25.04                               |

**Table S2 : MM-GBSA free energy of Binding for all the systems (Kcal/mol)**

|                     | <b>HFD</b> | <b>HYD</b> | <b>RGT</b> | <b>PGK</b> | <b>KKL</b> | <b>KLV</b> | <b>LPN</b> | <b>LPD</b> |
|---------------------|------------|------------|------------|------------|------------|------------|------------|------------|
| <b>VDWAALS</b>      | -30.6146   | -32.4373   | -21.4062   | -32.2494   | -49.9896   | -30.2382   | -20.4401   | -17.0966   |
| <b>EEL</b>          | 82.3187    | 370.5963   | -460.896   | -316.721   | -460.708   | -231.524   | -35.522    | 86.36      |
| <b>EGB</b>          | -63.5312   | -336.544   | 467.6686   | 327.3005   | 480.6365   | 250.0301   | 48.4188    | -74.9621   |
| <b>ESURF</b>        | -4.7872    | -5.02      | -3.9068    | -4.7674    | -7.2566    | -4.2561    | -2.8698    | -2.3053    |
| <b>DELTA G gas</b>  | 51.7041    | 338.159    | -482.302   | -348.97    | -510.697   | -261.763   | -55.9621   | 69.2634    |
| <b>DELTA G solv</b> | -68.3184   | -341.564   | 463.7617   | 322.5331   | 473.3799   | 245.774    | 45.549     | -77.2674   |
| <b>DELTA total</b>  | -16.6144   | -3.4054    | -18.54     | -26.4369   | -37.3175   | -15.9885   | -10.4131   | -8.004     |

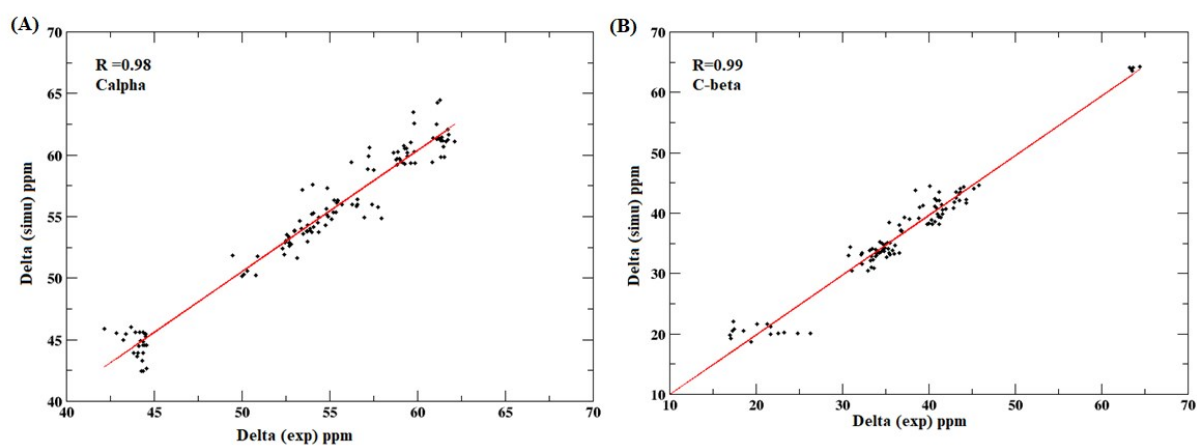

**Figure S2 : Comparison of shift from experimental structure with respect to simulated structure**

- A) Calpha shifts
- B) CBeta shifts

## Section B

### Results of additional set of simulations for the APO and two of 7-mer peptide systems viz. PGK and KKL

In order to support the findings obtained through the 100 ns molecular dynamics simulation of the representative A $\beta$  protofibril in the APO and the peptide bound complexes, an additional set of simulations was performed. The additional set of simulations was carried out for best two peptide systems viz. PGK and KKL and APO systems upto 200ns. The C $\alpha$  and C $\beta$  chemical shifts were computed using SHIFTX2 packages and compared. The correlation coefficient for C $\alpha$  atoms was 0.97 and for the C $\beta$  atoms were 0.98 (Supplementary figure S3). The high correlation between the theoretical and experimental NMR chemical shift values indicates that MD simulations are able to reproduce the structural ensemble of A $\beta$ 2 reasonably. The secondary structure analysis showed that % beta structure decreased while % coil structure increased (Supplementary Table S3). The Hydrogen Bond analysis showed the decrease in average number of hydrogen bond for entire protein as well inter-chain hydrogen for peptide bound system as compared to APO system (Supplementary Figure S4B). The inter-chain salt bridges interactions (Supplementary Figure S4 C and S4 D) and hydrophobic interactions (Supplementary Figure S4 E and S4 F) also showed destabilization in peptide bound system. It was observed that these additional set of simulations shows similar trend as that of results of two sets of 100ns simulations reported. Further the average delta energy of binding for all the PGK and KKL systems were calculated. It was observed that the KKL system had average deltaG binding energy and it was -38.63 Kcal/mol and for PGK system it was around -28.82 Kcal/mol.

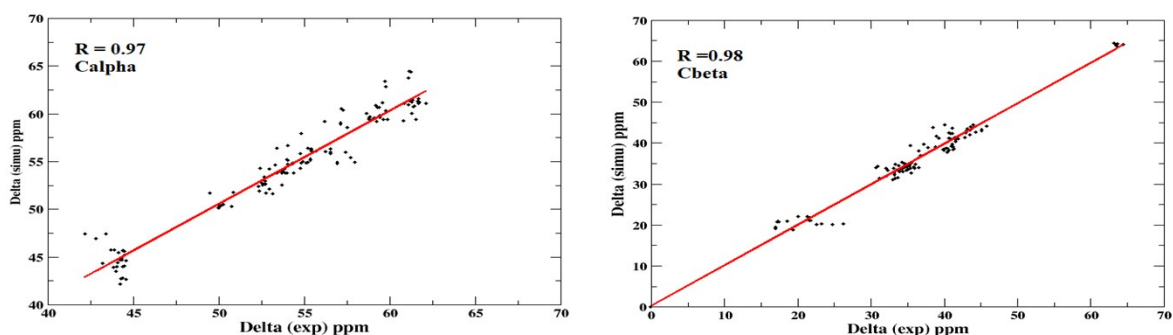

**Figure S3:** Comparison of shift from experimental structure with respect to simulated structure C $\alpha$  shifts and C $\beta$  shifts

**Table S3:** Percentage secondary structure content

| System | B-structure (B-sheet/B-bridge) | Coil | Turn/Bend | Alpha |
|--------|--------------------------------|------|-----------|-------|
| APO    | 60                             | 27   | 10        | 0     |

|     |    |    |    |   |
|-----|----|----|----|---|
| PGK | 44 | 34 | 12 | 1 |
| KKL | 48 | 33 | 14 | 0 |

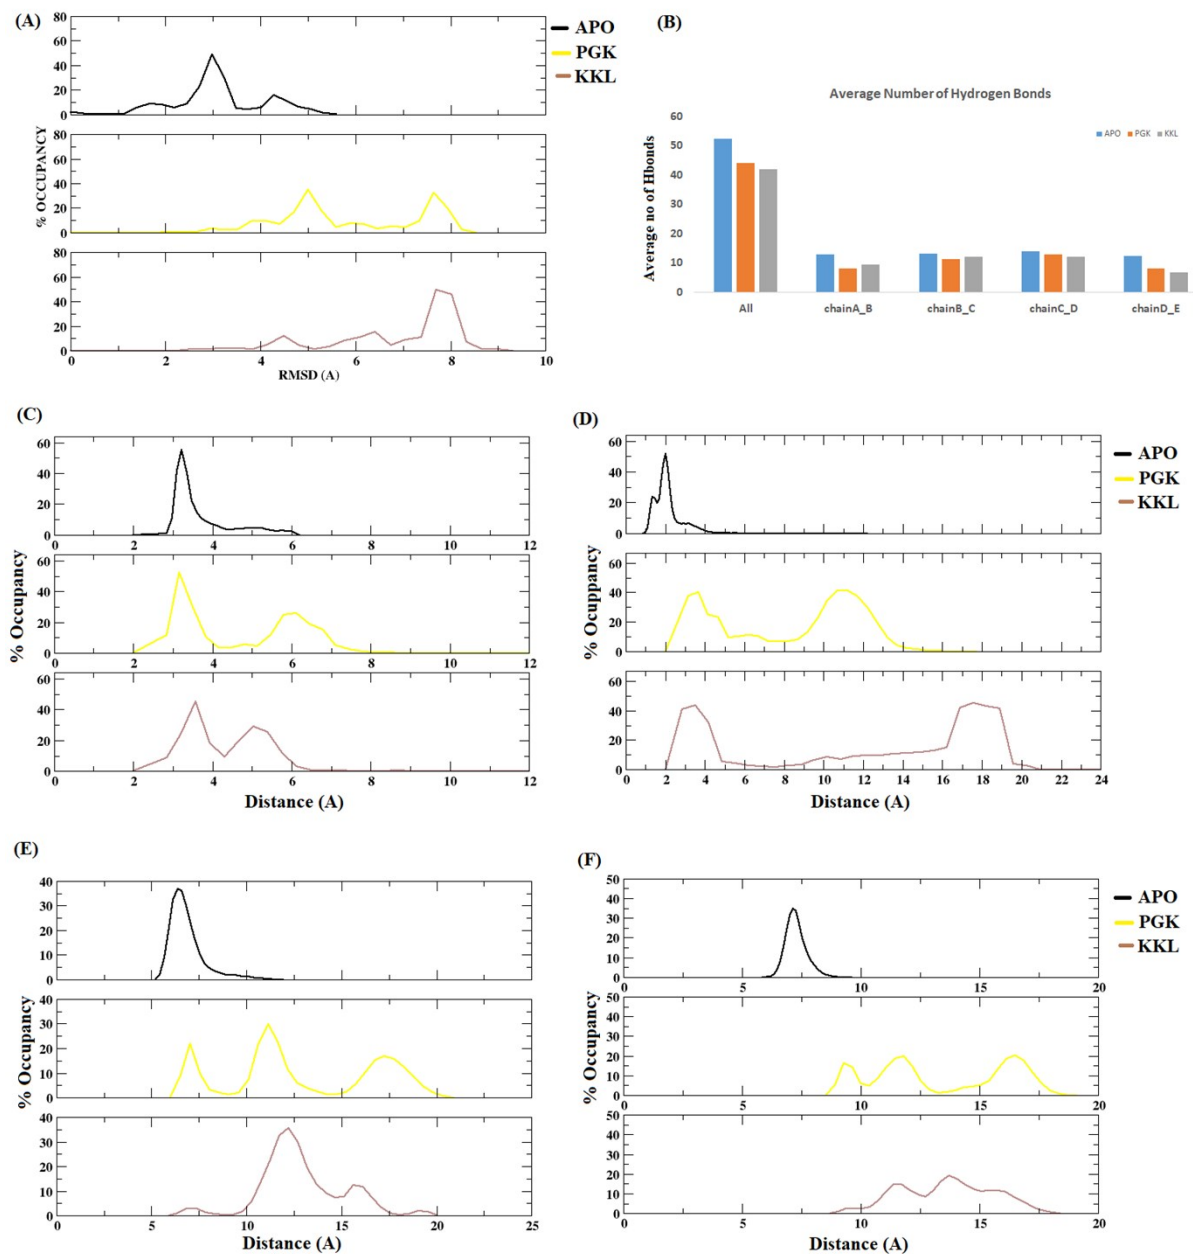

**Figure S4:** Results of 200ns simulation for APO, PGK and KKL system

- A)** Root Mean Square Deviation (RMSD) distribution
- B)** Average Number of Hydrogen Bond for all the systems for the entire system and between neighbouring chains
- C)** Distance distributions between ASP23 (chain A) and LYS28 (chain B) residues
- D)** Distance distributions between ASP23 (chain D) and LYS28 (chain E) residues
- E)** Distance distributions between ALA21 (chain A) and VAL36 (chain B) residues
- F)** Distance distributions between ALA21 (chain A) and VAL36 (chain B) residues
